# Supplementary material for: Hot spot formation and chemical reaction initiation in shocked HMX crystals with nanovoids: a large-scale reactive molecular dynamics study
Source: Royal Society of Chemistry journal article supplement (doi:10.1039/c6cp02015a), 2016-01-01
Supplement: c6cp02015a1.pdf [file c6cp02015a1.pdf]

Electronic Supplementary Information (ESI) Available

## Hot Spot Formation and Chemical Reaction Initiation in Shocked HMX Crystal with a Nanovoid: A Large-Scale Reactive Molecular Dynamics Study

(Tingting Zhou, Jianfeng Lou, Yangeng Zhang, Huajie Song and Fenglei Huang)

**Table S1.** Bond order cutoff values for various atom pairs. The algorithm of molecule recognition in the fragment analysis uses these values.

|   | C    | H    | O    | N    |
|---|------|------|------|------|
| C | 0.55 | 0.40 | 0.60 | 0.30 |
| H |      | 0.55 | 0.40 | 0.55 |
| O |      |      | 0.65 | 0.40 |
| N |      |      |      | 0.55 |

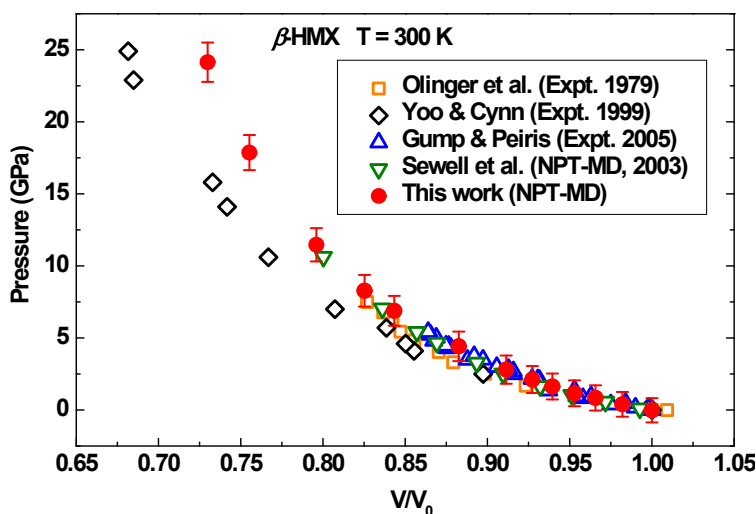

**Figure S1.** EOS for  $\beta$ -HMX under hydrostatic compression at  $T = 300$  K. The red fitted circles are the results from this work; the orange open squares are the experimental results from Olinger et al.;<sup>78</sup> the black open diamonds are the experimental results from Yoo and Cynn;<sup>79</sup> the blue open up triangles are the experimental results from Gump and Peiris;<sup>80</sup> the green open down triangles are the theoretical results from Sewell et al.<sup>81</sup> The result from ReaxFF-Ig is in excellent agreement with the experimental result from Gump and Peiris<sup>80</sup> and the theoretical result from Sewell et al.<sup>81</sup> Gump and Peiris<sup>80</sup> used a relatively pure batch of HMX thrice recrystallized in acetone, with the hope of obtaining the properties of pure materials, making it a good case with which to compare theoretical results for perfect crystal.

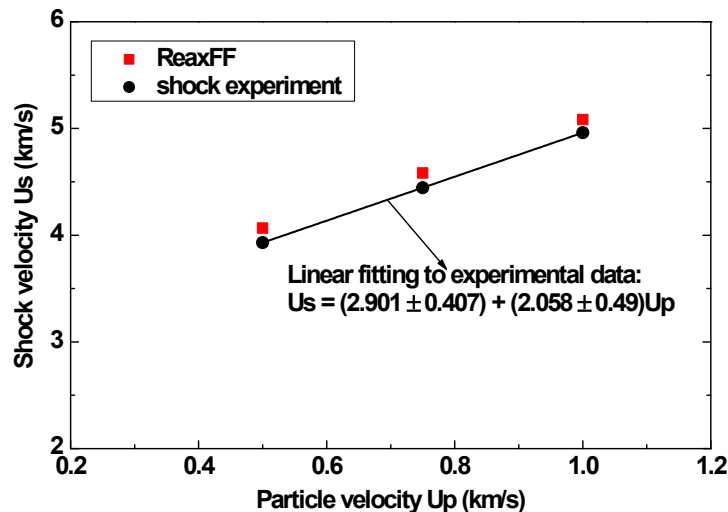

**Figure S2.** The relation between shock velocity ( $U_s$ ) and particle velocity ( $U_p$ ) for perfect single crystal HMX obtained from ReaxFF-MD simulations and shock experiments.<sup>82</sup> The line represents the linear fitting to the experimental data:  $U_s = (2.901 \pm 0.407) + (2.058 \pm 0.49)U_p$  for  $0.59 < U_p < 1.04$  km/s. The density of the HMX crystal is  $1.89$  g/cm<sup>3</sup> for both the MD simulation and the shock experiment. The  $U_s$  predicted by ReaxFF is a little higher than but is within the error range of experimental result, indicating good agreement.

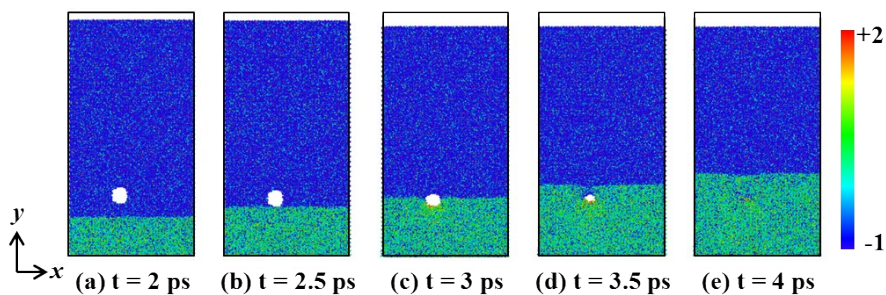

**Figure S3.** The illustrations of shock wave propagation and void collapse during  $2 \sim 4$  ps for the case of  $R = 2$  nm and  $U_p = 1$  km/s. Atoms are color coded by the magnitude of atom velocity along  $y$  direction: duck blue represents  $-1$  km/s, cyan  $0$  km/s, kelly  $1$  km/s, and red  $+2$  km/s. The maximal velocity for a few atoms reaches  $1.20$  km/s.

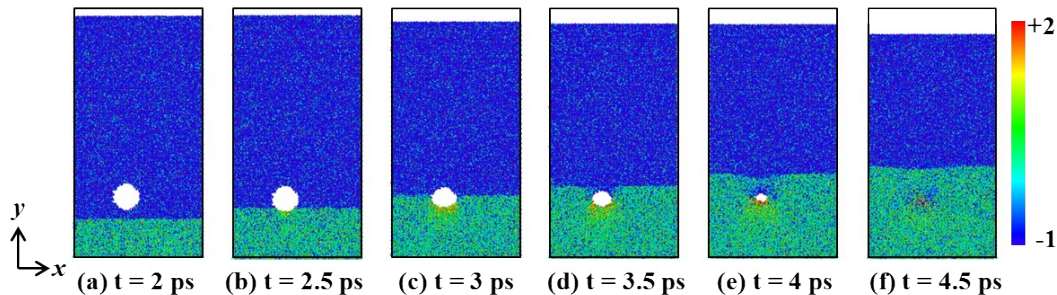

**Figure S4.** The illustrations of shock wave propagation and void collapse during  $2 \sim 4.5$  ps for the case of  $R = 3$  nm and  $U_p = 1$  km/s. Atoms are color coded by the magnitude of atom velocity along  $y$  direction: duck blue represents  $-1$  km/s, cyan  $0$  km/s, kelly  $1$  km/s, and red  $+2$  km/s. The maximal velocity for a few atoms reaches  $1.79$  km/s.

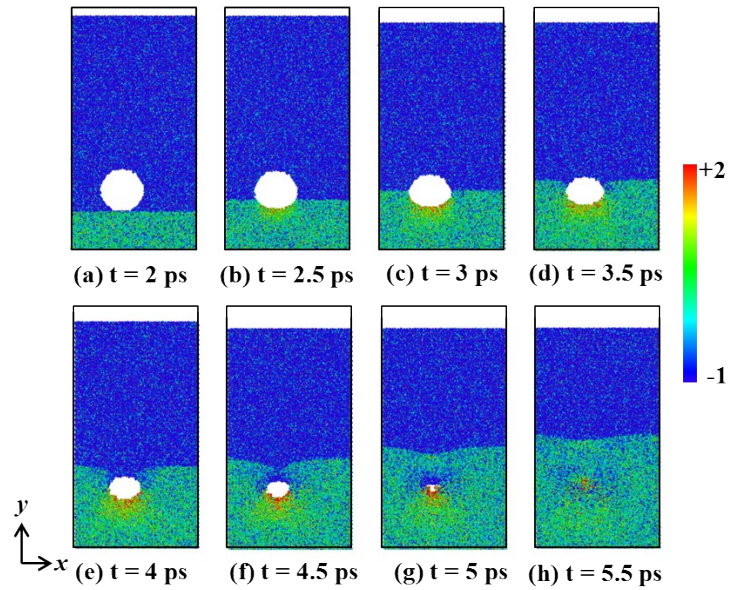

**Figure S5.** The illustrations of shock wave propagation and void collapse during 2 ~ 5.5 ps for the case of  $R = 5$  nm and  $U_p = 1$  km/s. Atoms are color coded by the magnitude of atom velocity along  $y$  direction: duck blue represents -1 km/s, cyan 0 km/s, kelly 1 km/s, and red +2 km/s. The maximal velocity for a few atoms reaches 2.92 km/s.

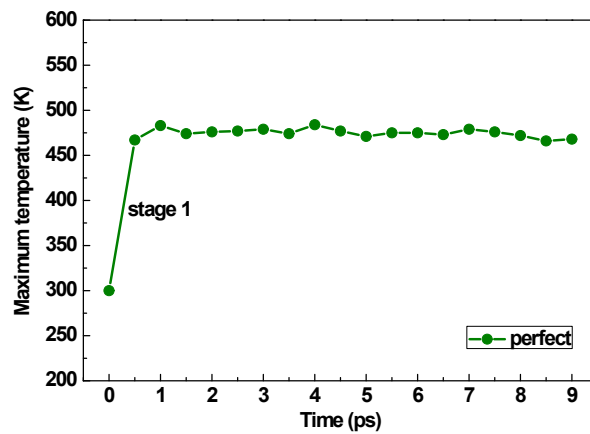

**Figure S6.** The time evolution of the maximum temperature for the perfect crystal under an impact velocity of 1 km/s

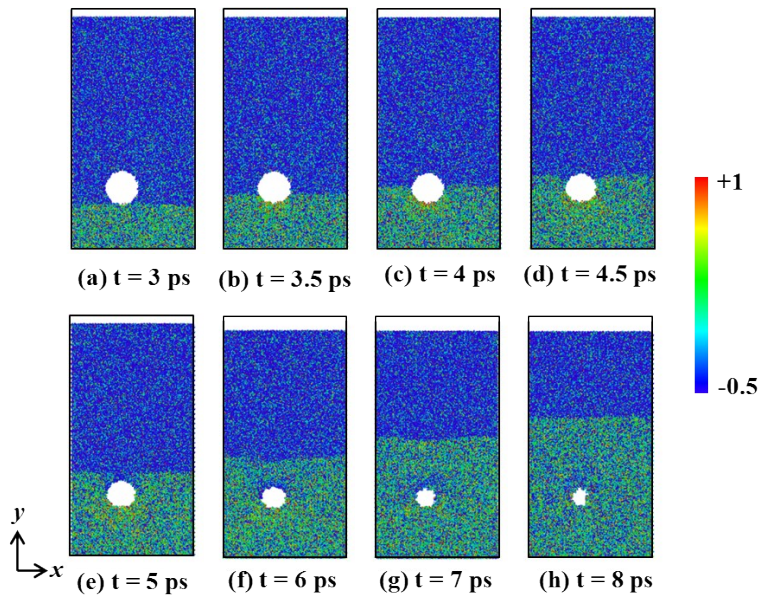

**Figure S7.** The illustrations of shock wave propagation and void collapse for the case of  $R = 4$  nm and  $U_p = 0.5$  km/s. Atoms are color coded by the magnitude of atom velocity along  $y$  direction: duck blue represents  $-0.5$  km/s, cyan  $0$  km/s, kelly  $0.5$  km/s, and red  $+1$  km/s. The maximal velocity for a few atoms reaches  $0.58$  km/s.

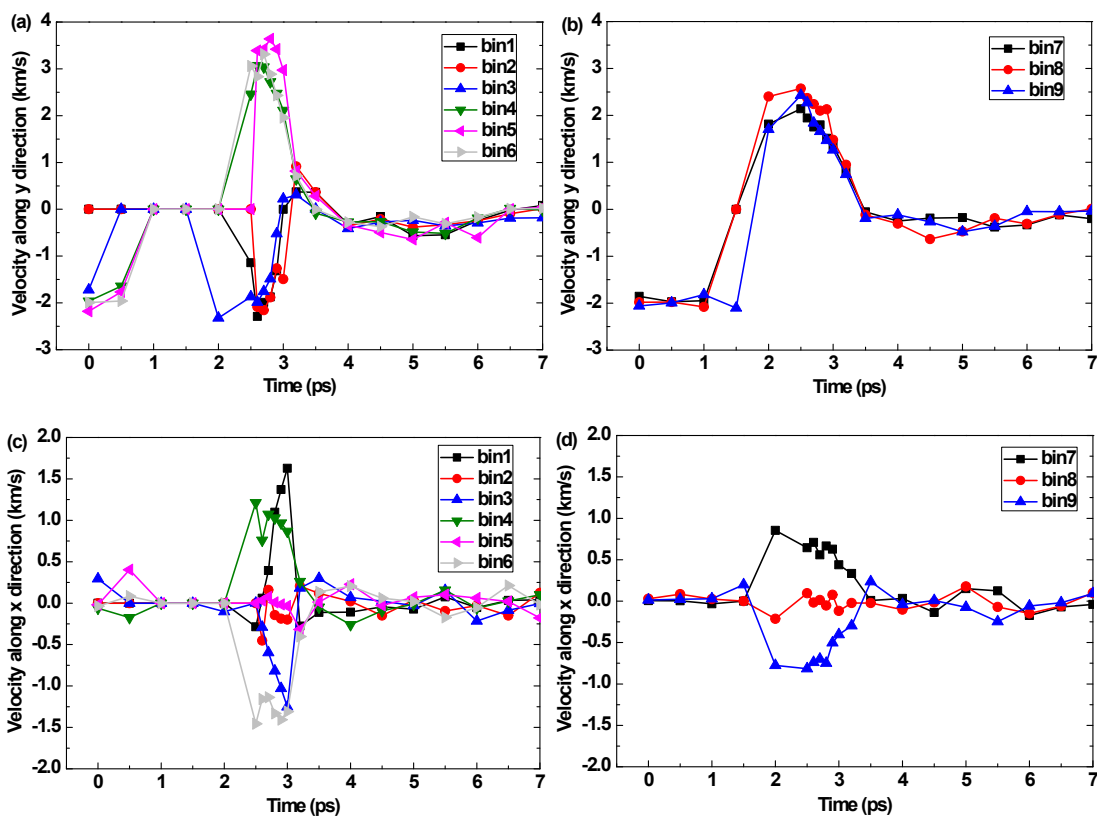

**Figure S8.** The averaged atom velocities as a function of time for the atoms in the bins as indicated in the parentheses of Table 1 for the crystal containing a 4 nm radius void under the impact velocity of 2 km/s. (a) and (b) represent the velocity along  $y$  direction; (c) and (d) represent the velocity along  $x$  direction.

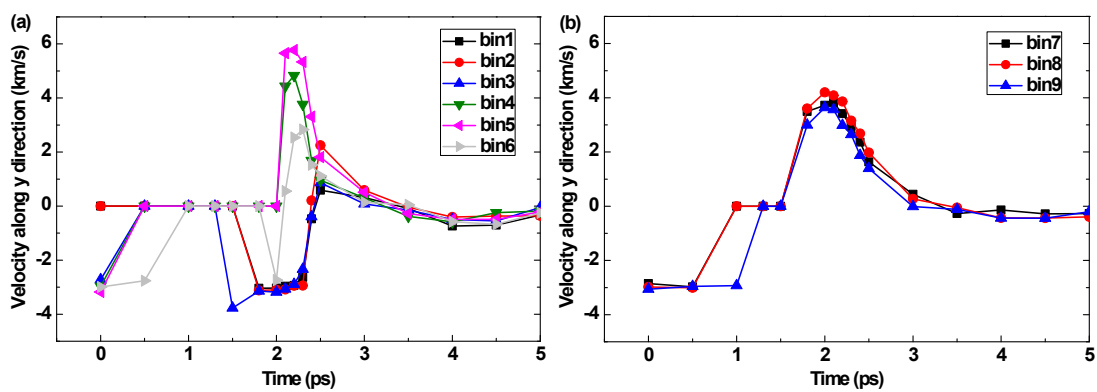

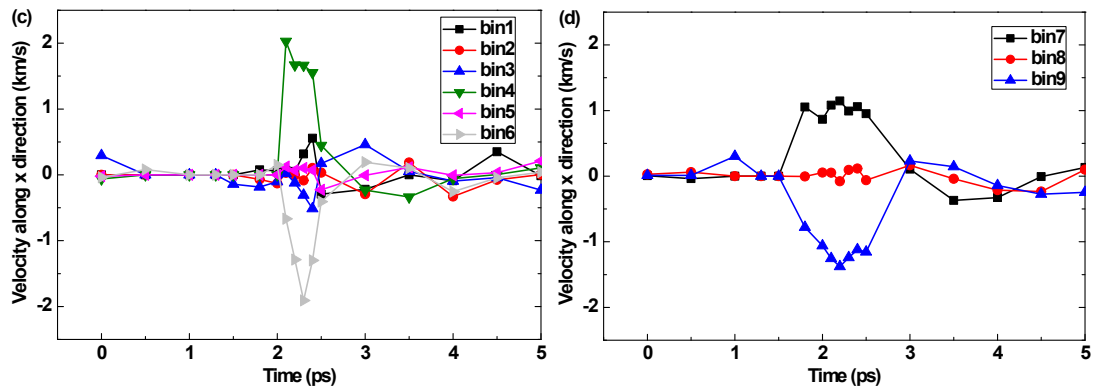

**Figure S9.** The averaged atom velocities as a function of time for the atoms in the bins as indicated in the parentheses of Table 1 for the crystal containing a 4 nm radius void under the impact velocity of 3 km/s. (a) and (b) represent the velocity along y direction; (c) and (d) represent the velocity along x direction.

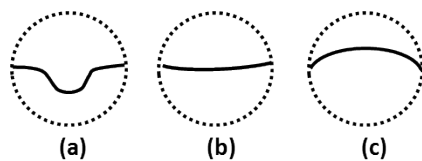

**Figure S10.** The simple illustrations of representative void shape during void collapse for the crystal containing a 4 nm radius void under the impact velocities of 1 (a), 2 (b), and 3 km/s (c). The difference in the dominant collapse mechanism leads to different void shapes during void collapse.

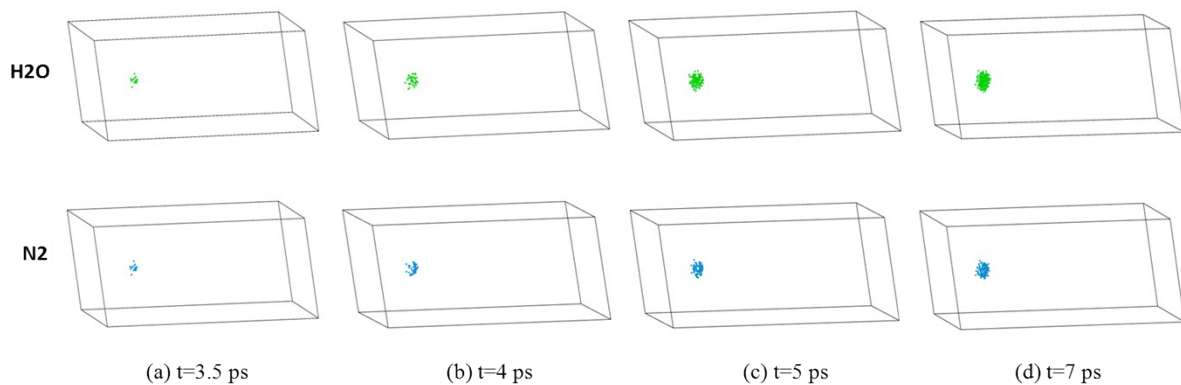

**Figure S11.** The spatial distributions of H<sub>2</sub>O (top row) and N<sub>2</sub> (bottom row) at various times for the crystal containing a 4 nm radius void under the impact velocity of 2 km/s

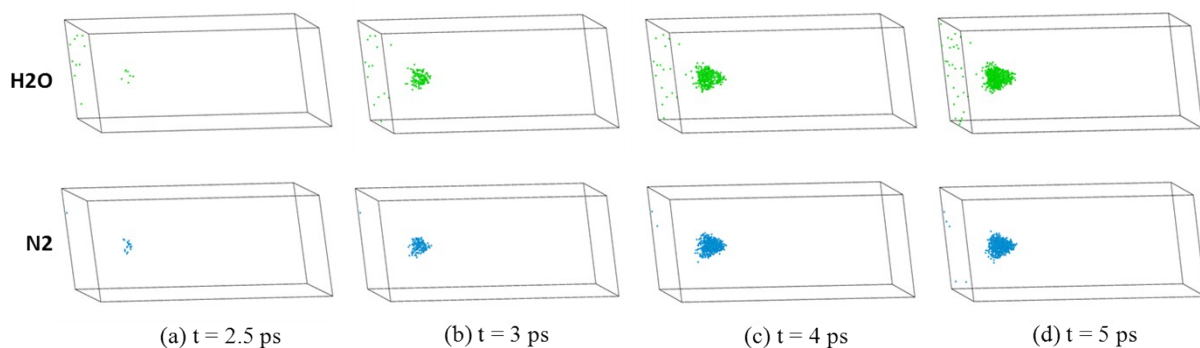

**Figure S12.** The spatial distributions of H<sub>2</sub>O (top row) and N<sub>2</sub> (bottom row) at various times for the crystal containing a 4 nm radius void under the impact velocity of 3 km/s
